# Supplementary material for: Computational Analysis of HIV-1 Resistance Based on Gene Expression Profiles and the Virus-Host Interaction Network
Source: PubMed Central journal article supplement (PMC3048858; doi:10.1371/journal.pone.0017291), 2011-03-04
Supplement: pone.0017291.s004.pdf [file pone.0017291.s004.pdf]

**Table S4 - Descriptions of 29 infection information exchanger gene identified from the 185 HIV-1 resistance genes**

| Gene Symbol | Target protein | Number of shortest paths between virus-targeted proteins | Description                                                                                                               |
|-------------|----------------|----------------------------------------------------------|---------------------------------------------------------------------------------------------------------------------------|
| CBL         | Yes            | 19859                                                    | CBL is an oncogene that was first identified as part of a transforming retrovirus [1].                                    |
| IL2         | Yes            | 12939                                                    | IL2 regulates CD4+ T cell production and survival [2].                                                                    |
| ABL1        | No             | 7516                                                     | ABL1 is a proto-oncogene that encodes a cytoplasmic and nuclear protein tyrosine kinase [3].                              |
| PTEN        | Yes            | 3942                                                     | Tat-dependent activation of the Egr1-PTEN-FOXO3a pathway provides a mechanism for HIV-1-associated CD4+ T cell death [4]. |
| PAK1        | Yes            | 3445                                                     | RAC1 to PAK1 and PI3K to PAK1 activation pathways are essential for nef-mediated pathogenesis of HIV [5].                 |
| GTF2B       | Yes            | 3061                                                     | GTF2B interacts with HIV-1 Vpr [6].                                                                                       |
| TIMP1       | Yes            | 2626                                                     | HIV infection increases TIMP1 levels [7].                                                                                 |
| SRF         | No             | 1821                                                     | HIV-1 Tat is phosphorylated by serum response factor (SRF) [8].                                                           |
| TJP1        | No             | 1821                                                     | HIV-1 gp120 proteins alter tight junction protein (TJP1) expression [9].                                                  |
| MRPS12      | No             | 1814                                                     | Mitochondrial ribosomal protein S12 (MRPS12).                                                                             |
| SOD2        | Yes            | 1801                                                     | HIV-1 Tat regulates the SOD2 basal promoter by altering SP1/SP3 binding activity [10].                                    |
| ICAM1       | Yes            | 1528                                                     | HIV-1 Tat up-regulates expression of the ICAM1 and VCAM1 genes [11].                                                      |
| MAP3K5      | Yes            | 1085                                                     | HIV-1 Nef inhibits MAP3K5 activity [12].                                                                                  |
| GHR         | No             | 911                                                      | HIV gp120 inhibits GHR in the somatotrophic axis during the pathogenesis of AIDS wasting [13].                            |
| RPS6KA5     | No             | 911                                                      | Ribosomal protein S6 kinase, 90 kDa, polypeptide 5 (RPS6KA5).                                                             |
| NFE2        | No             | 905                                                      | Nuclear factor erythroid-derived 2 (NFE2).                                                                                |
| ITGA3       | Yes            | 902                                                      | Integrin, alpha 3; antigen CD49C, alpha 3 subunit of VLA-3 receptor (ITGA3).                                              |
| HGF         | No             | 902                                                      | Overexpression of the HGF/c-Met complex is strongly correlated with oncogenic HIV infection [14].                         |
| PRKAR1A     | Yes            | 779                                                      | PRKAR1A phosphorylates HIV Nef [15].                                                                                      |
| CD9         | Yes            | 646                                                      | HIV-1 assembly into intracellular plasma membrane is dependent on Tetraspanins CD9 [16].                                  |
| CDK6        | No             | 453                                                      | HIV transactivator TAT binds to the                                                                                       |

|         |     |     |                                                                      |
|---------|-----|-----|----------------------------------------------------------------------|
|         |     |     | CDK6-activating kinase [17].                                         |
| MAPK7   | No  | 138 | Mitogen-activated protein kinase 7 (MAPK7).                          |
| CDC25A  | No  | 85  | HIV Vpr binds to CDC25 and inhibits CDC25 phosphatase activity [18]. |
| SOD1    | Yes | 17  | Tat decreased endogenous cellular, but not transduced, SOD1 [19].    |
| PRKAR2B | Yes | 16  | PRKAR2B interacts with Tat [20].                                     |
| MAFG    | No  | 14  | v-maf musculoaponeurotic fibrosarcoma oncogene homolog G (MAFG).     |
| ADK     | No  | 9   | ADK is an HIV-1 integrase inhibitor [21].                            |
| CFLAR   | No  | 5   | CASP8 and FADD-like apoptosis regulator (CFLAR).                     |
| GSTA4   | No  | 3   | Glutathione S-transferase alpha 4 (GSTA4).                           |

## Reference

- Langdon WY, Heath KG, Blake TJ (1992) The localization of the products of the c-cbl and v-cbl oncogenes during mitosis and transformation. *Curr Top Microbiol Immunol* 182: 467-474.
- Kelly E, Won A, Refaeli Y, Van Parijs L (2002) IL-2 and related cytokines can promote T cell survival by activating AKT. *J Immunol* 168: 597-603.
- Burton EA, Pendergast AM, Aballay A (2006) The *Caenorhabditis elegans* ABL-1 tyrosine kinase is required for *Shigella flexneri* pathogenesis. *Appl Environ Microbiol* 72: 5043-5051.
- Cook JA, August A, Henderson AJ (2002) Recruitment of phosphatidylinositol 3-kinase to CD28 inhibits HIV transcription by a Tat-dependent mechanism. *J Immunol* 169: 254-260.
- Renkema GH, Manninen A, Mann DA, Harris M, Saksela K (1999) Identification of the Nef-associated kinase as p21-activated kinase 2. *Curr Biol* 9: 1407-1410.
- Agostini I, Navarro JM, Rey F, Bouhamdan M, Spire B, et al. (1996) The human immunodeficiency virus type 1 Vpr transactivator: cooperation with promoter-bound activator domains and binding to TFIIB. *J Mol Biol* 261: 599-606.
- Leveque T, Le Pavec G, Boutet A, Tardieu M, Dormont D, et al. (2004) Differential regulation of gelatinase A and B and TIMP-1 and -2 by TNFalpha and HIV virions in astrocytes. *Microbes Infect* 6: 157-163.
- Kim MS, Merlo X, Wilson C, Lough J (2006) Co-activation of atrial natriuretic factor promoter by Tip60 and serum response factor. *J Biol Chem* 281: 15082-15089.

9. Kanmogne GD, Primeaux C, Grammas P (2005) HIV-1 gp120 proteins alter tight junction protein expression and brain endothelial cell permeability: implications for the pathogenesis of HIV-associated dementia. *J Neuropathol Exp Neurol* 64: 498-505.
10. Marecki JC, Cota-Gomez A, Vaitaitis GM, Honda JR, Porntadavity S, et al. (2004) HIV-1 Tat regulates the SOD2 basal promoter by altering Sp1/Sp3 binding activity. *Free Radic Biol Med* 37: 869-880.
11. Song HY, Ryu J, Ju SM, Park LJ, Lee JA, et al. (2007) Extracellular HIV-1 Tat enhances monocyte adhesion by up-regulation of ICAM-1 and VCAM-1 gene expression via ROS-dependent NF-kappaB activation in astrocytes. *Exp Mol Med* 39: 27-37.
12. Gelezianas R, Xu W, Takeda K, Ichijo H, Greene WC (2001) HIV-1 Nef inhibits ASK1-dependent death signalling providing a potential mechanism for protecting the infected host cell. *Nature* 410: 834-838.
13. Mulrone SE, McDonnell KJ, Pert CB, Ruff MR, Resch Z, et al. (1998) HIV gp120 inhibits the somatotrophic axis: a possible GH-releasing hormone receptor mechanism for the pathogenesis of AIDS wasting. *Proc Natl Acad Sci U S A* 95: 1927-1932.
14. Walker F, Kermorgant S, Darai E, Madelenat P, Cremieux AC, et al. (2003) Hepatocyte growth factor and c-Met in cervical intraepithelial neoplasia: overexpression of proteins associated with oncogenic human papillomavirus and human immunodeficiency virus. *Clin Cancer Res* 9: 273-284.
15. Li PL, Wang T, Buckley KA, Chenine AL, Popov S, et al. (2005) Phosphorylation of HIV Nef by cAMP-dependent protein kinase. *Virology* 331: 367-374.
16. Gordon-Alonso M, Yanez-Mo M, Barreiro O, Alvarez S, Munoz-Fernandez MA, et al. (2006) Tetraspanins CD9 and CD81 modulate HIV-1-induced membrane fusion. *J Immunol* 177: 5129-5137.
17. Ezhevsky SA, Nagahara H, Vocero-Akbani AM, Gius DR, Wei MC, et al. (1997) Hypo-phosphorylation of the retinoblastoma protein (pRb) by cyclin D:Cdk4/6 complexes results in active pRb. *Proc Natl Acad Sci U S A* 94: 10699-10704.
18. Huard S, Elder RT, Liang D, Li G, Zhao RY (2008) Human immunodeficiency virus type 1 Vpr induces cell cycle G2 arrest through Srk1/MK2-mediated phosphorylation of Cdc25. *J Virol* 82: 2904-2917.
19. Agrawal L, Louboutin JP, Strayer DS (2007) Preventing HIV-1 Tat-induced neuronal apoptosis using antioxidant enzymes: mechanistic and therapeutic implications. *Virology* 363: 462-472.
20. Zidovetzki R, Wang JL, Chen P, Jeyaseelan R, Hofman F (1998) Human immunodeficiency virus Tat protein induces interleukin 6 mRNA expression

in human brain endothelial cells via protein kinase C- and cAMP-dependent protein kinase pathways. *AIDS Res Hum Retroviruses* 14: 825-833.

21. Zhang X, Pais GC, Svarovskaia ES, Marchand C, Johnson AA, et al. (2003) Azido-containing aryl beta-diketo acid HIV-1 integrase inhibitors. *Bioorg Med Chem Lett* 13: 1215-1219.
